# Supplementary material for: Molecular profiling reveals primary mesothelioma cell lines recapitulate human disease
Source: PubMed Central journal article supplement (PMC4946883; doi:10.1038/cdd.2015.165), 2016-02-19
Supplement: cdd2015165x1.pdf [file cdd2015165x1.pdf]

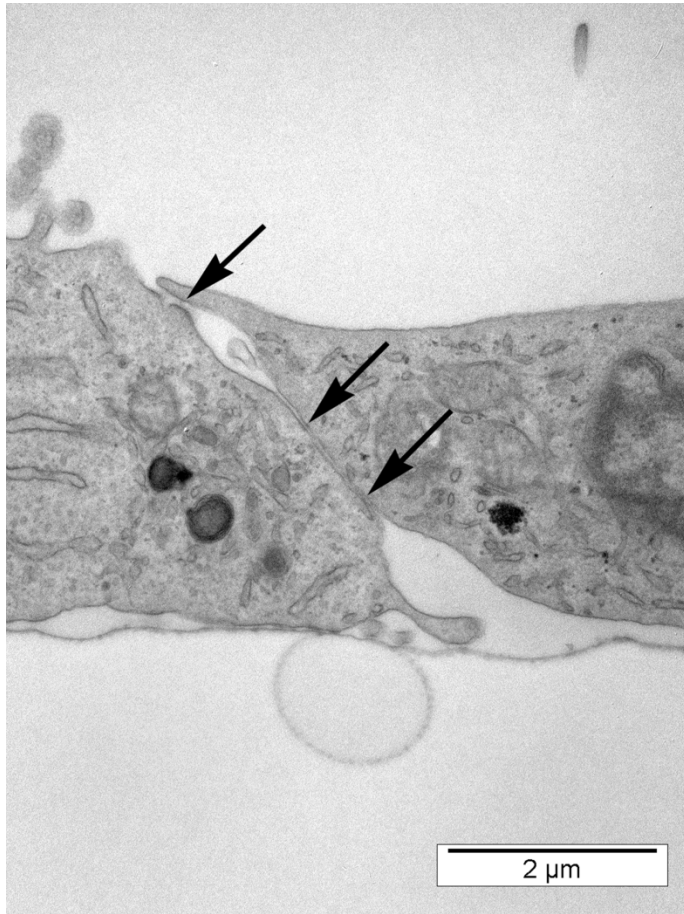

**Supplementary Figure S1.** Tight intercellular junctions (arrows) in primary mesothelial culture MESO-27T.
