# Supplementary material for: Molecular profiling reveals primary mesothelioma cell lines recapitulate human disease
Source: PubMed Central journal article supplement (PMC4946883; doi:10.1038/cdd.2015.165), 2016-02-19
Supplement: cdd2015165x2.pdf [file cdd2015165x2.pdf]

## Enrichment Profile of Type I interferon signalling pathway-related genes

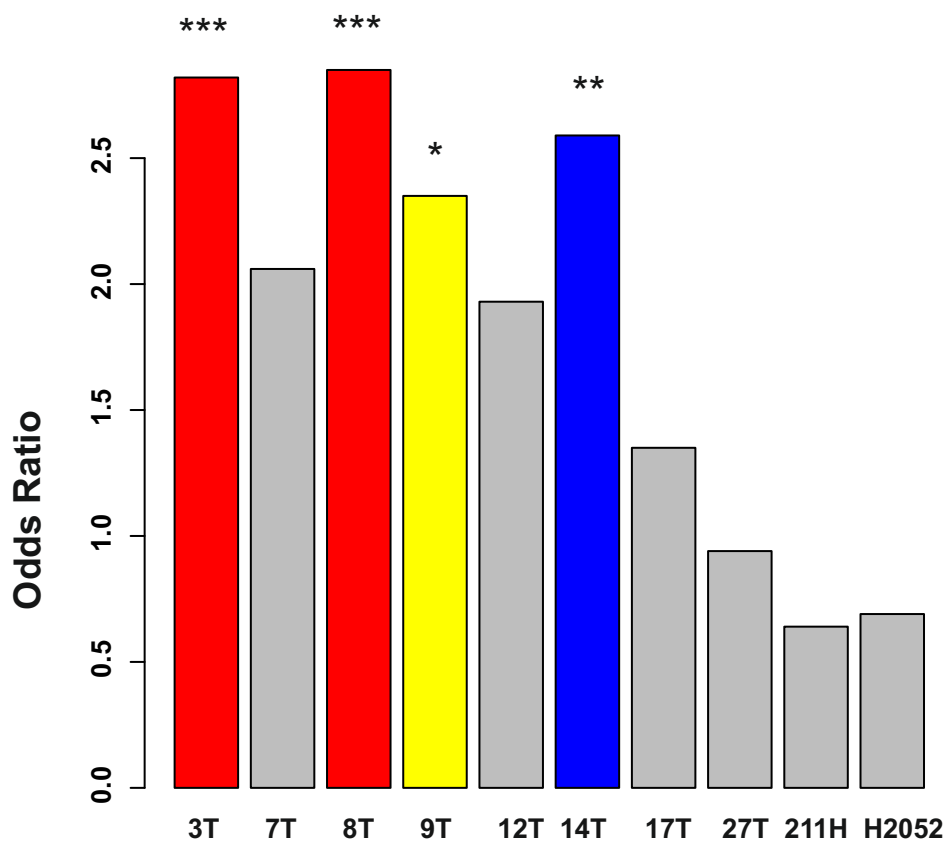

**Supplementary Figure S2.** GO Term Enrichment profile of the category ‘Type I interferon signalling pathway-related genes’ in primary and commercial cell lines and full statistical details of datasets used as reference. In contrast to primary cell lines, commercial cell lines MSTO-211H and NCI-H2052 display no enrichment for the type I interferon signalling pathway, \*\*\* indicates  $p < 0.001$ , \*\*  $p < 0.01$ , \*  $p < 0.05$ .
