# Supplementary material for: Molecular profiling reveals primary mesothelioma cell lines recapitulate human disease
Source: PubMed Central journal article supplement (PMC4946883; doi:10.1038/cdd.2015.165), 2016-02-19
Supplement: cdd2015165x3.pdf [file cdd2015165x3.pdf]

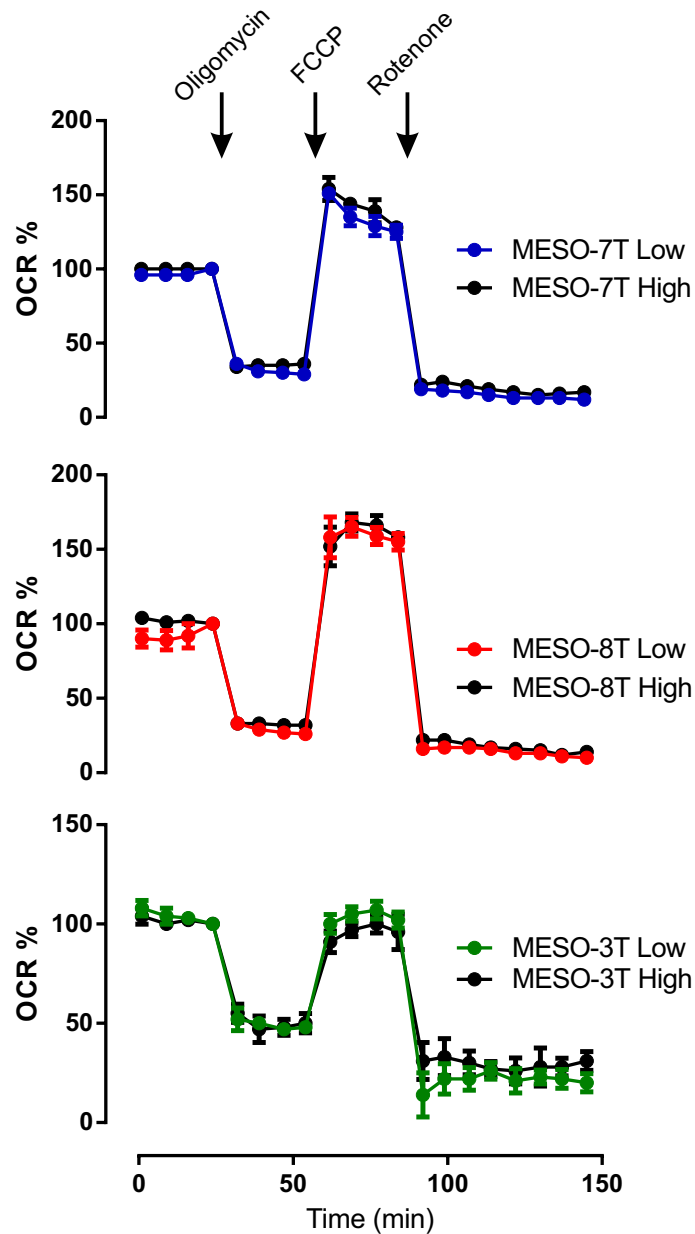

**Supplementary Figure S3.** Comparison of the metabolic profile of low and high passage primary cell lines. To assess the difference in metabolism between low and high passage primary mesothelioma lines,  $5 \times 10^4$  cells were seeded in XF24 microplates 24 h prior to real time measurements of oxidative phosphorylation (OCR) as described in Materials and Methods. Oligomycin, FCCP and Rotenone were sequentially injected to generate a standard mitochondrial stress test, which generated a trace that was identical between low and high passage MESO-7T, -8T and 3T cells. Data shown is from one experiment representative of 3 independent experiments. Data points show mean  $\pm$  SEM,  $n = 5$  (technical repeats).
