# Supplementary material for: Molecular profiling reveals primary mesothelioma cell lines recapitulate human disease
Source: PubMed Central journal article supplement (PMC4946883; doi:10.1038/cdd.2015.165), 2016-02-19
Supplement: cdd2015165x4.pdf [file cdd2015165x4.pdf]

| Powerplex16<br>Loci | Sample<br>3T Genomic | Sample<br>MESO-3T LOW | Sample<br>MESO-3T HIGH |
|---------------------|----------------------|-----------------------|------------------------|
| AMELO               | XY                   | XY                    | XY                     |
| D3                  | 15,18                | 18,18                 | 18,18                  |
| TH01                | 6,9.3                | 6,9.3                 | 6,9.3                  |
| D21                 | 31,33.2              | 31,33.2               | 31,33.2                |
| D18                 | 13,14                | 13,14                 | 13,14                  |
| PentaE              | 7,13                 | 7,13                  | 7,13                   |
| D5                  | 13,13                | 13,13                 | 13,13                  |
| D13                 | 11,12                | 11,12                 | 11,11                  |
| D7                  | 10,11                | 10,11                 | 10,11                  |
| D16                 | 11,13                | 11,13                 | 11,13                  |
| CSF                 | 10,11                | 10,11                 | 10,11                  |
| PentaD              | 10,10                | 10,10                 | 10,10                  |
| VWA                 | 17,17                | 17,17                 | 17,17                  |
| D8                  | 11,15                | 11,15                 | 11,15                  |
| TPOX                | 8,11                 | 8,11                  | 8,11                   |
| FGA                 | 23*,24               | 24,24                 | 24,24                  |

| Powerplex16<br>Loci | Sample<br>7T Genomic | Sample<br>MESO-7T LOW | Sample<br>MESO-7T HIGH |
|---------------------|----------------------|-----------------------|------------------------|
| AMELO               | XY                   | XY                    | XY                     |
| D3                  | 14,18                | 14,18                 | 14,18                  |
| TH01                | 6,9.3                | 6,6                   | 6,6                    |
| D21                 | 29,30                | 29,30                 | 29,30                  |
| D18                 | 13,20                | 13,20                 | 13,13                  |
| PentaE              | 14,17                | 14,17                 | 14,14                  |
| D5                  | 11,14                | 11,11                 | 11,11                  |
| D13                 | 8,11                 | 11,11                 | 11,11                  |
| D7                  | 10,10                | 10,10                 | 10,10                  |
| D16                 | 11,12                | 11,12                 | 11,12                  |
| CSF                 | 10,12                | 12,12                 | 12,12                  |
| PentaD              | 11,12                | 11,12                 | 11,12                  |
| VWA                 | 14,18                | 14,18                 | 14,18                  |
| D8                  | 10,13                | 10,13                 | 10,13                  |
| TPOX                | 8,8                  | 8,8                   | 8,8                    |
| FGA                 | 24,25                | 24,25                 | 24,25                  |

| Powerplex16<br>Loci | Sample<br>8T Genomic | Sample<br>MESO-8T LOW | Sample<br>MESO-8T HIGH |
|---------------------|----------------------|-----------------------|------------------------|
| AMELO               | XY                   | XY                    | XY                     |
| D3                  | 14,18                | 18,18                 | 18,18                  |
| TH01                | 7,9                  | 7,9                   | 7,9                    |
| D21                 | 30,30                | 30,30                 | 30,30                  |
| D18                 | 14,17                | 14,17                 | 14,17                  |
| PentaE              | 7,10                 | 7,10                  | 7,10                   |
| D5                  | 10,12                | 10,12                 | 10,12                  |
| D13                 | 10, 12*              | 10, 10                | 10, 12                 |
| D7                  | 10,10                | 10,10                 | 10,10                  |
| D16                 | 11,12                | 11,12                 | 11,12                  |
| CSF                 | 10,14                | 10,14                 | 10,14                  |
| PentaD              | 9,11                 | 9,11                  | 9,11                   |
| VWA                 | 16,19                | 16,19                 | 16,19                  |
| D8                  | 13,15                | 13,15                 | 13,15                  |
| TPOX                | 8,9                  | 8,9                   | 8,9                    |
| FGA                 | 21,24                | 21,24                 | 21,24                  |

| Powerplex16<br>Loci | Sample<br>14T Genomic | Sample<br>MESO-14T LOW | Sample<br>MESO-14T HIGH |
|---------------------|-----------------------|------------------------|-------------------------|
| AMELO               | XY                    | XY                     | XY                      |
| D3                  | 14,18                 | 18,18                  | 18,18                   |
| TH01                | 9,9.3                 | 9,9.3                  | 9,9.3                   |
| D21                 | 29,30                 | 29,30                  | 30,30                   |
| D18                 | 13,18                 | 13,18                  | 13,18                   |
| PentaE              | 7,12                  | 7,12                   | 7,12                    |
| D5                  | 11,11                 | 11,11                  | 11,11                   |
| D13                 | 11,11                 | 11,11                  | 11,11                   |
| D7                  | 10,14                 | 10,14                  | 10,14                   |
| D16                 | 9,11                  | 9,11                   | 9,11                    |
| CSF                 | 11,12                 | 11,12                  | 11,12                   |
| PentaD              | 9,12                  | 9,12                   | 12,12                   |
| VWA                 | 16,18                 | 16,18                  | 16,18                   |
| D8                  | 14,15                 | 14,15                  | 14,15                   |
| TPOX                | 8,9                   | 8,9                    | 8,9                     |
| FGA                 | 24,24                 | 24,24                  | 24,24                   |

| Powerplex16<br>Loci | Sample<br>27T Genomic | Sample<br>MESO-27T LOW | Sample<br>MESO-27T HIGH |
|---------------------|-----------------------|------------------------|-------------------------|
| AMELO               | XY                    | XY                     | XY                      |
| D3                  | 15,17                 | 15,17                  | 15,17                   |
| TH01                | 9.3,9.3               | 9.3,9.3                | 9.3,9.3                 |
| D21                 | 29,30                 | 29,30                  | 29,30                   |
| D18                 | 13,21                 | 13,13                  | 13,13                   |
| PentaE              | 7,10                  | 7,10                   | 7,10                    |
| D5                  | 11,13                 | 11,13                  | 11,13                   |
| D13                 | 12,13                 | 12,13                  | 12,13                   |
| D7                  | 10,11                 | 10,11                  | 10,11                   |
| D16                 | 12,13                 | 13,13                  | 13,13                   |
| CSF                 | 11,13                 | 11,13                  | 11,13                   |
| PentaD              | 9,9                   | 9,9                    | 9,9                     |
| VWA                 | 16,17                 | 16,17                  | 16,17                   |
| D8                  | 8,13                  | 8,13                   | 8,13                    |
| TPOX                | 8,8                   | 8,8                    | 8,8                     |
| FGA                 | 23,25                 | 23,23                  | 23,23                   |

**Supplementary Figure S4.** Difference in numerical values for STR loci between the original tumors and cell lines derived from those tumors, and between low (<10) and high (30-50) passage cells in culture (\* indicates Peak Area Difference (n) Below-threshold peak stutter).
