# Supplementary material for: Molecular profiling reveals primary mesothelioma cell lines recapitulate human disease
Source: PubMed Central journal article supplement (PMC4946883; doi:10.1038/cdd.2015.165), 2016-02-19
Supplement: cdd2015165x5.pdf [file cdd2015165x5.pdf]

# Tumor 7T genomic DNA

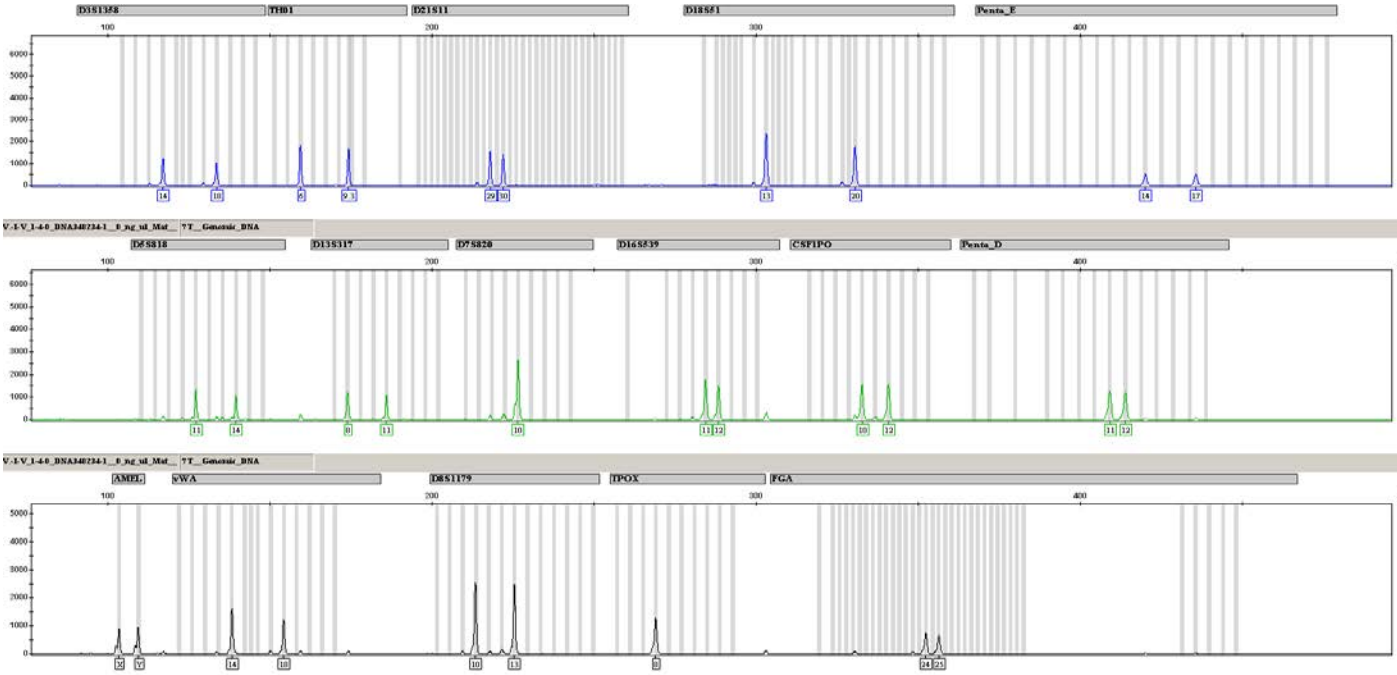

# Primary cell line MESO-7T genomic DNA

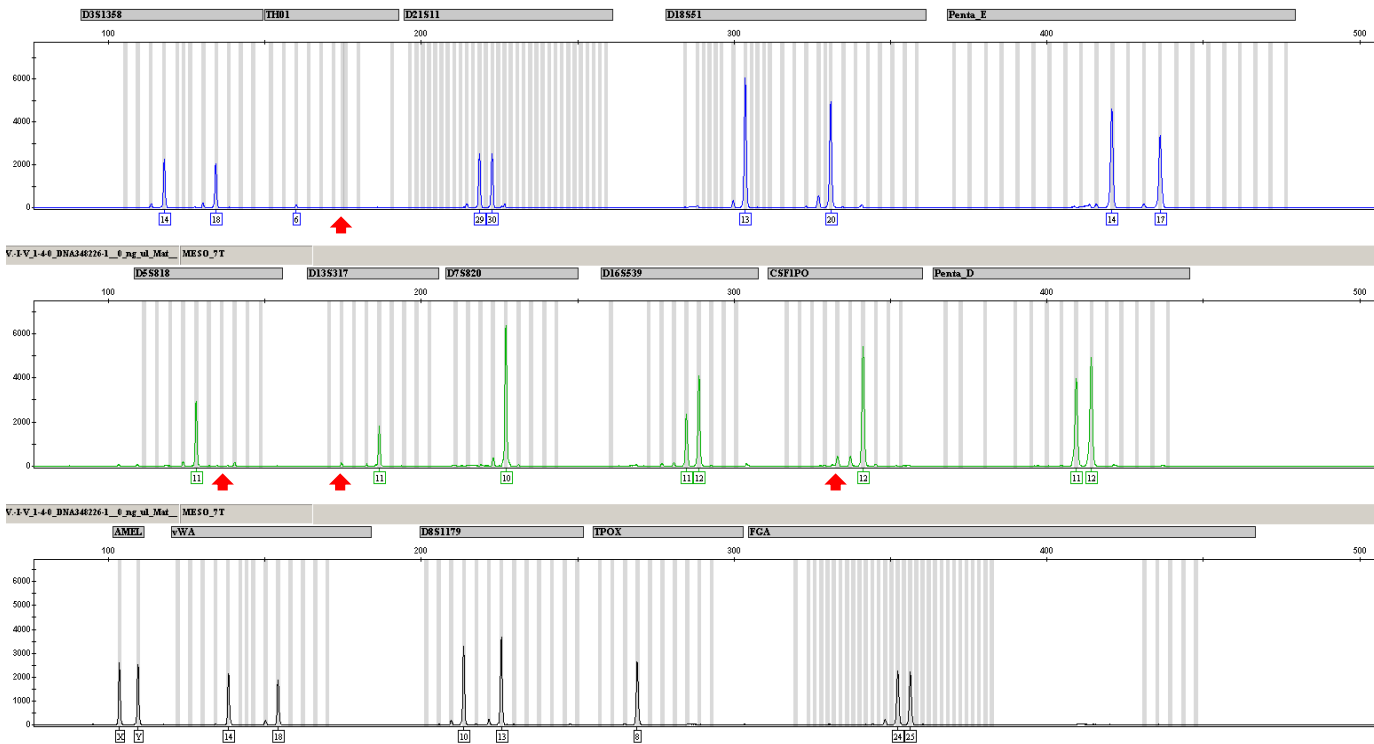

**Supplementary Figure S5.** An electropherogram of Powerplex PCR reaction. Top lines show STR profile in 7T tumor genomic DNA; no peak imbalance, indicative of a mixture in the sample, was noted. Bottom profile shows STR profile of the primary cell line MESO-7T. Arrows indicate positions of allele alterations compared to the parental genomic DNA.
