# Supplementary material for: Molecular profiling reveals primary mesothelioma cell lines recapitulate human disease
Source: PubMed Central journal article supplement (PMC4946883; doi:10.1038/cdd.2015.165), 2016-02-19
Supplement: cdd2015165x6.pdf [file cdd2015165x6.pdf]

| <b>Cell Line ID</b> | <b>FCS Content in Media</b> | <b>Doubling Time (hours)</b> |
|---------------------|-----------------------------|------------------------------|
| MESO-3T             | 2%                          | 197.7641                     |
| MESO-3T             | 10%                         | 141.5779                     |
| MESO-7T             | 2%                          | 84.39534                     |
| MESO-7T             | 10%                         | 62.49785                     |
| MESO-8T             | 2%                          | 32.39441                     |
| MESO-8T             | 10%                         | 38.62516                     |
| MESO-9T             | 2%                          | 40.84242                     |
| MESO-9T             | 10%                         | 41.87054                     |
| MESO-12T            | 2%                          | 49.84425                     |
| MESO-12T            | 10%                         | 37.13787                     |
| MESO-14T            | 2%                          | 69.64033                     |
| MESO-14T            | 10%                         | 66.99422                     |
| MESO-17T            | 2%                          | 53.1163                      |
| MESO-17T            | 10%                         | 40.84242                     |
| MESO-27T            | 2%                          | 37.8541                      |
| MESO-27T            | 10%                         | 31.62447                     |

**Supplementary Table 1.** Doubling time of the primary mesothelioma cell lines.
