# Supplementary material for: Molecular profiling reveals primary mesothelioma cell lines recapitulate human disease
Source: PubMed Central journal article supplement (PMC4946883; doi:10.1038/cdd.2015.165), 2016-02-19
Supplement: cdd2015165x7.pdf [file cdd2015165x7.pdf]

|        |       |         |        |        |
|--------|-------|---------|--------|--------|
| ABL1   | KDR   | BRAF    | MPL    | EGFR   |
| EZH2   | RB1   | FLT3    | SRC    | HRAS   |
| JAK3   | APC   | MET     | CSF1R  | NRAS   |
| PTEN   | FGFR2 | SMARCB1 | GNAQ   | VHL    |
| AKT1   | KIT   | CDH1    | NOTCH1 | ERBB2  |
| FBXW7  | RET   | GNA11   | STK11  | IDH1   |
| IDH2   | ATM   | MLH1    | CTNNB1 | PDGFRA |
| PTPN11 | FGFR3 | SMO     | HNF1A  | ERBB4  |
| ALK    | KRAS  | CDKN2A  | NPM1   | JAK2   |
| FGFR1  | SMAD4 | GNAS    | TP53   | PIK3CA |

**Supplementary Table 2.** The Ion AmpliSeq™ Cancer Panel used in the TaqMan® Mutation Detection Assays to sequence gDNA from primary cell lines.
