# Supplementary material for: Molecular profiling reveals primary mesothelioma cell lines recapitulate human disease
Source: PubMed Central journal article supplement (PMC4946883; doi:10.1038/cdd.2015.165), 2016-02-19
Supplement: cdd2015165x8.pdf [file cdd2015165x8.pdf]

| <b>Cancer Dataset</b>                                                                                               | <b>Common Genes (primary MM cell lines list, 500 genes)</b>                                                                                                                                                                                                                                                                                                                                                                                                    |
|---------------------------------------------------------------------------------------------------------------------|----------------------------------------------------------------------------------------------------------------------------------------------------------------------------------------------------------------------------------------------------------------------------------------------------------------------------------------------------------------------------------------------------------------------------------------------------------------|
| Dataset: METABRIC (Breast cancer), subtype = "ER_IHC_status_pos"; 100 top genes associated (negative) with survival | <p style="text-align: center;">32 genes:</p> CCNE2 FOXM1 TPX2 CENPN KIFC1 OIP5 KIF14 CDC20 PKMYT1 ASF1B EXO1 CEP55<br>TYMS E2F2 SGOL1 CENPF CDCA8 CDCA3 KIF23 RACGAP1 FBXO5 TTK PRC1 TICRR<br>ZWINT KIF11 KIF4A CDCA5 CCNB2 UBE2C ESPL1 ORC6                                                                                                                                                                                                                   |
| Dataset: GSE30219 (Lung cancer), subtype = "ALL"; 300 top genes associated (negative) with survival                 | <p style="text-align: center;">66 genes:</p> CSE1L CENPN FANCI KIFC1 MCM4 UBE2T TMPO MCM2 CDCA7 CDK1 PRIM1 CHAF1A<br>TYMS SSRP1 MCM6 CENPF RRM1 RACGAP1 GMNN TTK MSH2 NEK2 KNTC1 MTFR2<br>KIF4A RAD51 CDCA5 CCNB2 ORC6 CCNE2 FOXM1 TPX2 ORC1 STIL ARL6IP6 OIP5<br>NEMP1 KIF14 FAM111B CDC20 BUB1B DKC1 EXO1 CEP55 MCM8 MCM3 POLQ CDT1<br>CDCA3 RAD54L MCM7 SAPCD2 PRC1 CKS1B SHMT2 MSH6 ZWINT PSMC3IP SNRPA<br>NCAPD3 KIF18A RFC5 HNRNPH3 SLC25A19 UBE2C ESPL1 |

**Supplementary Table 3.** Top genes associated with survival from Lung and Breast cancer gene lists that are also present in Mesothelioma gene list (500 genes).
