# Supplementary material for: Molecular profiling reveals primary mesothelioma cell lines recapitulate human disease
Source: PubMed Central journal article supplement (PMC4946883; doi:10.1038/cdd.2015.165), 2016-02-19
Supplement: cdd2015165x9.pdf [file cdd2015165x9.pdf]

| # | P-value<br>FDR<br>(p-value)* | ODDS<br>Ratio | Gene Expression Dataset                                                                                                | Number of top survival-<br>associated genes in Primary MM<br>cell line gene list<br>(top 500 aberrant genes) |
|---|------------------------------|---------------|------------------------------------------------------------------------------------------------------------------------|--------------------------------------------------------------------------------------------------------------|
| 1 | 6.99e-44<br>(4.96e-46)       | 12.26         | Dataset: GSE30219 (Lung cancer), subtype = "ALL"; 300 top genes associated (negative) with survival                    | 66<br>(out of 500)                                                                                           |
| 2 | 3.54e-24<br>(1.06e-25)       | 15.99         | Dataset: METABRIC (Breast cancer), subtype = "ER_IHC_status_pos"; 100 top genes associated (negative) with survival    | 32<br>(out of 500)                                                                                           |
| 3 | 1.70e-22<br>(6.72e-24)       | 7.30          | Dataset: GSE4271 (Glioma (high-grade )), subtype = "Sex_F"; 300 top genes associated (negative) with survival          | 46<br>(out of 500)                                                                                           |
| 4 | 2.83e-09<br>(4.31e-10)       | 3.04          | Dataset: GSE39582 (Colon cancer), subtype = "Sex_M"; 700 top genes associated (positive) with survival                 | 43<br>(out of 500)                                                                                           |
| 5 | 2.73e-07<br>(4.71e-08)       | 6.52          | Dataset: GSE16560 (Prostate Cancer), subtype = "fusion_0"; 100 top genes associated (negative) with survival           | 15<br>(out of 500)                                                                                           |
| 6 | 0.0024<br>(0.000609)         | 4.07          | Dataset: GSE32894 (Urothelial Carcinoma), subtype = "tumor_grade_G2"; 100 top genes associated (pos/neg) with survival | 9<br>(out of 500)                                                                                            |
| 7 | 0.0303<br>(0.0091)           | 3.14          | Dataset: GSE13876 (Ovarian Cancer), subtype = "ALL"; 100 top genes associated (negative) with survival                 | 7<br>(out of 500)                                                                                            |

**Supplementary Table 4.** Full statistical details of the datasets showing the highest similarity with MM primary cell lines based on GO Term Enrichment Analysis.
